# Supplementary material
Source: PubMed Central journal article supplement (PMC6855112)
Supplement: baADV2019000449-suppl1.pdf [file baADV2019000449-suppl1.pdf]

## Supplemental Table 1.

Patient characteristic and outcomes from overall cohort and derivation cohort and validation cohort

|                                    | Overall cohort<br>(N=616) | Derivation cohort<br>(N=308) | Validation cohort<br>(N=308) | P     |
|------------------------------------|---------------------------|------------------------------|------------------------------|-------|
| <b>HCT time period</b>             | Aug. 1999 - May 2015      | Aug. 1999 - April 2009       | May 2009 - May 2015          |       |
| <b>Survival Follow Up (months)</b> |                           |                              |                              |       |
| median (95% CI)                    | 54.3 (2.0-181.5)          | 80.8 (72.3-88.6)             | 36.6 (32.7-41.8)             | <.001 |
| range                              | 1.97 - 84.63              | 11.05- 181.51                | 1.97 - 84.63                 |       |
| <b>Outcomes</b>                    | <b>2y / LFU</b>           | <b>2y / LFU</b>              | <b>2y / LFU</b>              |       |
| Deceased, N (%)                    | 179 (29) / 216 (35)       | 103 (33) / 132 (43)          | 76 (25) / 84 (27)            |       |
| Events, N (%)                      | 229 (37) / 259 (42)       | 129 (42) / 152 (49)          | 100 (32) / 107 (35)          |       |
| Relapse incidence, N (%)           | 157 (25) / 175 (28)       | 95 (31) / 109 (35)           | 62 (20) / 66 (21)            |       |
| NRM, N(%)                          | 72 (12) / 79 (13)         | 34 (11) / 38 (12)            | 38 (12) / 41 (13)            |       |
| Sec. Malignancy, N (%)             | 0 (0) / 5 (1)             | 0 (0) / 5 (2)                | 0 (0) / 0 (0)                |       |
|                                    | <b>Estimates (%)</b>      | <b>Estimates (%)</b>         | <b>Estimates (%)</b>         |       |
| 2y-OS (95% CI)                     | 70 (66 - 74)              | 66 (61 - 72)                 | 73 (68 - 79)                 | .022  |
| 4y-OS (95% CI)                     | 63 (59 - 68)              | 59 (53 - 65)                 | 70 (64 - 75)                 | .023  |
| 2y-EFS (95%CI)                     | 62 (58 - 66)              | 58 (53 - 64)                 | 66 (60 - 71)                 | .059  |
| 4y-EFS (95%CI)                     | 57 (53 - 61)              | 53 (47 - 59)                 | 62 (56 - 68)                 | .027  |
| 2y-CIR (95%CI)                     | 27 (23 - 30)              | 31 (25 - 36)                 | 22 (16 - 27)                 | .008  |
| 4y-CIR (95%CI)                     | 30 (26 - 34)              | 35 (30 - 40)                 | 24 (19 - 29)                 | .003  |
| 2y-TRM (95% CI)                    | 12 (10 - 15)              | 11 (8 - 15)                  | 13 (9 - 17)                  | .518  |
| 4y-TRM (95% CI)                    | 14 (11 - 17)              | 13 (9 - 16)                  | 14 (10 - 18)                 | .484  |
| <b>aGVHD, N (%)</b>                |                           |                              |                              | .864† |
| Grade 0                            | 225 (37)                  | 109 (35)                     | 116 (38)                     |       |
| grade 1                            | 138 (22)                  | 78 (25)                      | 60 (19)                      |       |
| Grade 2                            | 168 (27)                  | 81 (26)                      | 87 (28)                      |       |
| Grade 3                            | 51 (8)                    | 24 (8)                       | 27 (9)                       |       |
| Grade 4                            | 25 (4)                    | 12 (4)                       | 13 (4)                       |       |
| no data                            | 9 (2)                     | 4 (1)                        | 5 (2)                        |       |
| <b>cGVHD, N(%)</b>                 |                           |                              |                              | .938† |
| none                               | 472 (77)                  | 232 (75)                     | 240 (78)                     |       |
| yes                                | 128 (21)                  | 67 (22)                      | 61 (20)                      |       |
| extended                           | 33                        | 20                           | 13                           |       |
| limited                            | 50                        | 29                           | 21                           |       |
| unspecified state                  | 45                        | 18                           | 27                           |       |
| no data                            | 16 (3)                    | 9                            | 7                            |       |

P values determined using log-rank test.

†P values determined using Fisher exact test.

## Supplemental Table 2.

Univariate analysis of OS for the overall, derivation and validation cohorts

|                              | Overall cohort<br>N=616 |       | Derivation cohort<br>N=308 |       | Validation cohort<br>N=308 |      |
|------------------------------|-------------------------|-------|----------------------------|-------|----------------------------|------|
|                              | 2y-OS                   | P     | 2y-OS                      | P     | 2y-OS                      | P    |
| <b>HCT time period</b>       | Aug. 1999 -<br>May 2015 |       | Aug. 1999 -<br>April 2009  |       | May 2009 -<br>May 2015     |      |
| <b>MRD<sub>pre-HCT</sub></b> |                         | <.001 |                            | <.001 |                            | .018 |
| neg                          | 77% (72-81)             |       | 74% (68-81)                |       | 80% (73-86)                |      |
| low                          | 80% (73-88)             |       | 81% (68-95)                |       | 80% (71-89)                |      |
| high                         | 61% (50-72)             |       | 57% (43-71)                |       | 67% (51-83)                |      |
| very high                    | 49% (39-59)             |       | 42% (28-55)                |       | 58% (43-73)                |      |
| <b>Sex</b>                   |                         | .469  |                            | .710  |                            | .479 |
| female                       | 69% (63-75)             |       | 65% (57-74)                |       | 73% (65-81)                |      |
| male                         | 72% (67-76)             |       | 67% (61-74)                |       | 77% (71-83)                |      |
| <b>Age groups</b>            |                         | .736  |                            | .795  |                            | .653 |
| < 2 years                    | 77% (61-93)             |       | 77% (54-100)               |       | 77% (54-100)               |      |
| 2 to 10 years                | 71% (66-76)             |       | 66% (58-73)                |       | 78% (71-84)                |      |
| ≥ 10 years                   | 70% (65-75)             |       | 67% (59-75)                |       | 73% (66-80)                |      |
| <b>Remission Status</b>      |                         | <.001 |                            | .001  |                            | .095 |
| CR1                          | 75% (69-81)             |       | 73% (65-81)                |       | 77% (69-84)                |      |
| CR2                          | 71% (66-76)             |       | 66% (59-73)                |       | 76% (70-83)                |      |
| >CR2                         | 46% (31-62)             |       | 42% (23-61)                |       | 53% (28-79)                |      |
| <b>Site of relapse</b>       |                         | .941  |                            | .685  |                            | .434 |
| isol. BM                     | 71% (66-77)             |       | 65% (57-73)                |       | 79% (71-86)                |      |
| isol. extramed               | 71% (58-84)             |       | 77% (54-100)               |       | 69% (53-85)                |      |
| combined                     | 69% (56-81)             |       | 62% (43-82)                |       | 74% (58-91)                |      |
| <b>Time to relapse</b>       |                         | <.001 |                            | <.001 |                            | .015 |
| very early                   | 51% (40-63)             |       | 41% (25-58)                |       | 61% (45-76)                |      |
| early                        | 66% (57-74)             |       | 55% (41-68)                |       | 75% (65-86)                |      |
| late                         | 83% (76-89)             |       | 81% (71-90)                |       | 85% (77-94)                |      |
| <b>Immunophenotype</b>       |                         | .558  |                            | .075  |                            | .241 |
| BCP                          | 70% (66-74)             |       | 64% (59-70)                |       | 77% (71-82)                |      |
| T lineage                    | 73% (65-81)             |       | 76% (65-88)                |       | 70% (59-81)                |      |
| <b>Donor</b>                 |                         | .007  |                            | .264  |                            | .010 |
| MSD                          | 79% (73-84)             |       | 71% (62-80)                |       | 86% (79-93)                |      |
| MUD                          | 70% (65-76)             |       | 67% (59-75)                |       | 74% (66-82)                |      |
| MMD                          | 62% (50-75)             |       | 58% (42-74)                |       | 70% (50-90)                |      |
| cord                         | 64% (55-73)             |       | 59% (42-76)                |       | 65% (55-76)                |      |
| <b>Stem-cell source</b>      |                         | .021  |                            | .110  |                            | .072 |
| BM                           | 75% (70-79)             |       | 70% (64-77)                |       | 79% (73-85)                |      |
| PB                           | 64% (55-74)             |       | 58% (46-70)                |       | 76% (62-90)                |      |
| CB                           | 65% (57-74)             |       | 61% (46-76)                |       | 67% (58-77)                |      |
| <b>Conditioning</b>          |                         | .011  |                            | .051  |                            | .179 |
| TBI-based                    | 73% (69-77)             |       | 69% (63-75)                |       | 77% (72-82)                |      |
| Non-TBI-based                | 60% (50-70)             |       | 56% (43-69)                |       | 66% (51-81)                |      |

Abbreviations: MRD minimal residual disease, CR complete remission; CR2 second complete remission; BCP B-cell precursor; BM bone marrow; PB peripheral blood; CB cord blood; MSD matched sibling donor; MUD matched unrelated donor; MMD mismatched donor; TBI total body irradiation; qPCR Real-time PCR; MFC multiparameter flow cytometry

*P* values determined using Log-rank test.

### Supplemental Table 3.

Univariate analysis of EFS for the overall, derivation and validation cohorts

|                              | Overall cohort<br>N=616 |       | Derivation cohort<br>N=308 |       | Validation cohort<br>N=308 |       |
|------------------------------|-------------------------|-------|----------------------------|-------|----------------------------|-------|
|                              | 2y-EFS                  | P     | 2y-EFS                     | P     | 2y-EFS                     | P     |
| <b>HCT time period</b>       | Aug. 1999 - May 2015    |       | Aug. 1999 - April 2009     |       | May 2009 - May 2015        |       |
| <b>MRD<sub>pre-HCT</sub></b> |                         | <.001 |                            | <.001 |                            | <.001 |
| neg                          | 68% (63-74)             |       | 65% (58-72)                |       | 72% (65-79)                |       |
| low                          | 70% (61-79)             |       | 69% (53-85)                |       | 71% (60-82)                |       |
| high                         | 55% (44-66)             |       | 53% (39-67)                |       | 58% (40-75)                |       |
| very high                    | 34% (25-44)             |       | 32% (20-45)                |       | 37% (22-52)                |       |
| <b>Sex</b>                   |                         | .671  |                            | .657  |                            | .253  |
| female                       | 61% (54-67)             |       | 60% (51-69)                |       | 61% (52-71)                |       |
| male                         | 62% (57-67)             |       | 57% (50-64)                |       | 68% (61-75)                |       |
| <b>Age groups</b>            |                         | .980  |                            | .468  |                            | .489  |
| < 2 years                    | 65% (47-84)             |       | 77% (54-100)               |       | 54% (27-81)                |       |
| 2 to 10 years                | 61% (56-67)             |       | 56% (48-64)                |       | 67% (60-75)                |       |
| ≥ 10 years                   | 62% (56-67)             |       | 58% (50-67)                |       | 65% (57-73)                |       |
| <b>Remission Status</b>      |                         | .001  |                            | .002  |                            | .331  |
| CR1                          | 66% (60-73)             |       | 66% (57-75)                |       | 67% (58-76)                |       |
| CR2                          | 61% (56-66)             |       | 56% (49-64)                |       | 66% (58-73)                |       |
| >CR2                         | 40% (24-55)             |       | 34% (16-53)                |       | 51% (25-77)                |       |
| <b>Site of relapse</b>       |                         | .754  |                            | .540  |                            | .332  |
| isol. BM                     | 62% (55-68)             |       | 56% (47-64)                |       | 69% (60-78)                |       |
| isol. extramed               | 61% (47-76)             |       | 69% (44-94)                |       | 58% (40-76)                |       |
| combined                     | 57% (43-70)             |       | 50% (30-70)                |       | 63% (45-81)                |       |
| <b>Time to relapse</b>       |                         | <.001 |                            | <.001 |                            | .003  |
| very early                   | 40% (28-51)             |       | 32% (17-48)                |       | 47% (30-64)                |       |
| early                        | 55% (46-64)             |       | 45% (32-59)                |       | 64% (51-76)                |       |
| late                         | 75% (68-83)             |       | 73% (61-84)                |       | 78% (68-88)                |       |
| <b>Immunophenotype</b>       |                         | .245  |                            | .061  |                            | .683  |
| BCP                          | 61% (56-65)             |       | 56% (49-62)                |       | 66% (60-72)                |       |
| T lineage                    | 66% (58-75)             |       | 69% (57-81)                |       | 64% (52-76)                |       |
| <b>Donor</b>                 |                         | .082  |                            | .559  |                            | .064  |
| MSD                          | 66% (59-73)             |       | 60% (50-70)                |       | 73% (63-82)                |       |
| MUD                          | 62% (56-68)             |       | 60% (52-68)                |       | 66% (57-74)                |       |
| MMD                          | 55% (42-68)             |       | 50% (33-66)                |       | 65% (43-86)                |       |
| cord                         | 56% (46-66)             |       | 53% (36-70)                |       | 58% (46-69)                |       |
| <b>Stem-cell source</b>      |                         | .166  |                            | .322  |                            | .234  |
| BM                           | 64% (59-69)             |       | 61% (54-68)                |       | 67% (60-74)                |       |
| PB                           | 57% (47-67)             |       | 51% (38-63)                |       | 69% (54-84)                |       |
| CB                           | 59% (50-68)             |       | 56% (41-71)                |       | 60% (49-71)                |       |
| <b>Conditioning</b>          |                         | .001  |                            | .031  |                            | .033  |
| TBI-based                    | 64% (60-69)             |       | 61% (55-67)                |       | 68% (62-73)                |       |
| Non-TBI-based                | 47% (37-57)             |       | 45% (32-58)                |       | 51% (35-67)                |       |

Abbreviations: MRD minimal residual disease, CR complete remission; CR2 second complete remission; BCP B-cell precursor; BM bone marrow; PB peripheral blood; CB cord blood; MSD matched sibling donor; MUD matched unrelated donor; MMD mismatched donor; TBI total body irradiation; qPCR Real-time PCR; MFC multiparameter flow cytometry

*P* values determined using Log-rank test.

## Supplemental Table 4.

Univariate analysis of CIR for the overall, derivation and validation cohorts

|                              | Overall cohort<br>N=616 |       | Derivation cohort<br>N=308 |       | Validation cohort<br>N=308 |      |
|------------------------------|-------------------------|-------|----------------------------|-------|----------------------------|------|
|                              | 2y-CIR                  | P     | 2y-CIR                     | P     | 2y-CIR                     | P    |
| <b>HCT time period</b>       | Aug. 1999 - May 2015    |       | Aug. 1999 - April 2009     |       | May 2009 - May 2015        |      |
| <b>MRD<sub>pre-HCT</sub></b> |                         | <.001 |                            | .002  |                            | .001 |
| neg                          | 20% (16-24)             |       | 24% (18-30)                |       | 15% (10-21)                |      |
| low                          | 19% (11-26)             |       | 25% (10-40)                |       | 16% (8-24)                 |      |
| high                         | 35% (25-46)             |       | 41% (27-55)                |       | 27% (12-42)                |      |
| very high                    | 44% (34-54)             |       | 47% (34-61)                |       | 40% (25-54)                |      |
| <b>Sex</b>                   |                         | .913  |                            | .270  |                            | .128 |
| female                       | 26% (20-31)             |       | 27% (19-35)                |       | 24% (17-32)                |      |
| male                         | 25% (21-30)             |       | 33% (27-40)                |       | 17% (12-23)                |      |
| <b>Age groups</b>            |                         | .625  |                            | .141  |                            | .579 |
| < 2 years                    | 19% (4-34)              |       | 8% (0-22)                  |       | 31% (6-56)                 |      |
| 2 to 10 years                | 27% (22-32)             |       | 34% (27-42)                |       | 20% (13-26)                |      |
| ≥ 10 years                   | 24% (19-29)             |       | 29% (21-37)                |       | 20% (13-26)                |      |
| <b>Remission Status</b>      |                         | .042  |                            | .122  |                            | .444 |
| CR1                          | 20% (15-25)             |       | 24% (16-32)                |       | 17% (10-24)                |      |
| CR2                          | 28% (23-33)             |       | 34% (27-41)                |       | 22% (16-28)                |      |
| >CR2                         | 34% (20-49)             |       | 38% (20-57)                |       | 27% (4-49)                 |      |
| <b>Time to relapse</b>       |                         | <.001 |                            | <.001 |                            | .042 |
| very early                   | 46% (34-57)             |       | 62% (45-78)                |       | 32% (17-46)                |      |
| early                        | 32% (24-41)             |       | 42% (28-55)                |       | 25% (14-35)                |      |
| late                         | 16% (10-23)             |       | 19% (10-29)                |       | 13% (5-22)                 |      |
| <b>Site of relapse</b>       |                         | .532  |                            | .696  |                            | .680 |
| isol. BM                     | 29% (23-34)             |       | 36% (27-44)                |       | 20% (13-28)                |      |
| isol. extramed               | 20% (8-32)              |       | 23% (0-46)                 |       | 19% (5-32)                 |      |
| combined                     | 31% (19-44)             |       | 33% (14-52)                |       | 30% (12-47)                |      |
| <b>Immunophenotype</b>       |                         | .251  |                            | .332  |                            | .034 |
| BCP                          | 27% (23-30)             |       | 32% (26-38)                |       | 21% (16-26)                |      |
| T lineage                    | 21% (14-29)             |       | 25% (14-37)                |       | 18% (9-27)                 |      |
| <b>Donor</b>                 |                         | .707  |                            | .799  |                            | .959 |
| MSD                          | 28% (21-34)             |       | 35% (25-44)                |       | 20% (12-29)                |      |
| MUD                          | 25% (20-31)             |       | 30% (22-37)                |       | 21% (13-28)                |      |
| MMD                          | 29% (17-40)             |       | 31% (16-46)                |       | 25% (6-44)                 |      |
| cord                         | 20% (13-27)             |       | 25% (10-40)                |       | 18% (9-26)                 |      |
| <b>Stem-cellsource</b>       |                         | .132  |                            | .240  |                            | .726 |
| BM                           | 26% (22-31)             |       | 30% (24-37)                |       | 22% (16-28)                |      |
| PB                           | 31% (22-40)             |       | 37% (26-49)                |       | 19% (6-32)                 |      |
| CB                           | 18% (11-25)             |       | 22% (9-35)                 |       | 16% (8-24)                 |      |
| <b>Conditioning</b>          |                         | .005  |                            | .081  |                            | .050 |
| TBI-based                    | 23% (20-27)             |       | 29% (23-34)                |       | 19% (14-23)                |      |
| Non-TBI-based                | 37% (27-47)             |       | 40% (28-53)                |       | 32% (17-46)                |      |

Abbreviations: MRD minimal residual disease, CR complete remission; CR2 second complete remission; BCP B-cell precursor; BM bone marrow; PB peripheral blood; CB cord blood; MSD matched sibling donor; MUD matched unrelated donor; MMD mismatched donor; TBI total body irradiation; qPCR Real-time PCR; MFC multiparameter flow cytometry

*P* values determined using Gray's test.

## Supplemental Table 5.

Univariate analysis of NRM for the overall, derivation and validation cohorts

|                              | Overall cohort          |       | Derivation cohort         |      | Validation cohort      |      |
|------------------------------|-------------------------|-------|---------------------------|------|------------------------|------|
|                              | N=616                   |       | N=308                     |      | N=308                  |      |
|                              | 2y-NRM                  | P     | 2y-NRM                    | P    | 2y-NRM                 | P    |
| <b>HCT time period</b>       | Aug. 1999 -<br>May 2015 |       | Aug. 1999 -<br>April 2009 |      | May 2009 -<br>May 2015 |      |
| <b>MRD<sub>pre-HCT</sub></b> |                         | .056  |                           | .070 |                        | .587 |
| neg                          | 11% (7-14)              |       | 10% (6-15)                |      | 11% (6-16)             |      |
| low                          | 10% (5-16)              |       | 6% (0-15)                 |      | 12% (5-19)             |      |
| high                         | 9% (2-15)               |       | 6% (0-13)                 |      | 12% (1-23)             |      |
| very high                    | 20% (12-28)             |       | 21% (10-32)               |      | 19% (7-30)             |      |
| <b>Sex</b>                   |                         | .646  |                           | .387 |                        | .850 |
| female                       | 12% (8-17)              |       | 13% (7-19)                |      | 12% (6-18)             |      |
| male                         | 11% (8-14)              |       | 10% (6-14)                |      | 13% (8-17)             |      |
| <b>Age groups</b>            |                         | .564  |                           | .599 |                        | .894 |
| < 2 years                    | 15% (2-29)              |       | 15% (0-35)                |      | 15% (0-35)             |      |
| 2 to 10 years                | 10% (7-14)              |       | 9% (5-14)                 |      | 11% (6-17)             |      |
| ≥ 10 years                   | 13% (9-17)              |       | 13% (7-18)                |      | 13% (8-18)             |      |
| <b>Remission Status</b>      |                         | .024  |                           | .023 |                        | .477 |
| CR1                          | 12% (8-16)              |       | 10% (4-15)                |      | 14% (8-20)             |      |
| CR2                          | 10% (7-13)              |       | 9% (5-14)                 |      | 11% (6-15)             |      |
| >CR2                         | 24% (11-38)             |       | 27% (10-44)               |      | 20% (0-40)             |      |
| <b>Time to relapse</b>       |                         | .478  |                           | .435 |                        | .205 |
| very early                   | 12% (5-20)              |       | 6% (0-14)                 |      | 18% (6-31)             |      |
| early                        | 11% (6-17)              |       | 13% (4-22)                |      | 10% (2-17)             |      |
| late                         | 8% (3-12)               |       | 8% (1-15)                 |      | 7% (1-14)              |      |
| <b>Site of relapse</b>       |                         | .138  |                           | .402 |                        | .077 |
| isol. BM                     | 8% (5-12)               |       | 8% (4-13)                 |      | 8% (3-14)              |      |
| isol. extramed               | 18% (7-29)              |       | 8% (0-22)                 |      | 22% (8-36)             |      |
| combined                     | 12% (3-21)              |       | 17% (2-32)                |      | 7% (0-17)              |      |
| <b>Immunophenotype</b>       |                         | .900  |                           | .138 |                        | .266 |
| BCP                          | 12% (9-15)              |       | 12% (8-16)                |      | 11% (7-15)             |      |
| T lineage                    | 11% (6-17)              |       | 5% (0-11)                 |      | 16% (8-25)             |      |
| <b>Donor</b>                 |                         | <.001 |                           | .019 |                        | .005 |
| MSD                          | 5% (2-8)                |       | 5% (1-9)                  |      | 4% (0-8)               |      |
| MUD                          | 12% (8-15)              |       | 11% (6-16)                |      | 13% (7-19)             |      |
| MMD                          | 16% (6-26)              |       | 19% (7-32)                |      | 10% (0-23)             |      |
| cord                         | 22% (14-30)             |       | 22% (8-36)                |      | 22% (13-31)            |      |
| <b>Stem-cellsource</b>       |                         | <.001 |                           | .042 |                        | .012 |
| BM                           | 9% (6-11)               |       | 8% (5-12)                 |      | 9% (5-13)              |      |
| PB                           | 12% (5-18)              |       | 12% (4-20)                |      | 11% (1-21)             |      |
| CB                           | 21% (14-28)             |       | 22% (9-35)                |      | 21% (12-30)            |      |
| <b>Conditioning</b>          |                         | 0.351 |                           | .438 |                        | .534 |
| TBI-based                    | 11% (8-14)              |       | 10% (7-14)                |      | 12% (8-16)             |      |
| Non-TBI-based                | 15% (8-22)              |       | 14% (5-23)                |      | 16% (4-27)             |      |



Abbreviations: MRD minimal residual disease, CR complete remission; CR2 second complete remission; BCP B-cell precursor; BM bone marrow; PB peripheral blood; CB cord blood; MSD matched sibling donor; MUD matched unrelated donor; MMD mismatched donor; TBI total body irradiation; qPCR Real-time PCR; MFC multiparameter flow cytometry

*P* values determined using Gray's test.

## Supplemental Table 6.

Comparison of the ability of qPCR and MFC methods for detecting MRD<sub>pre-HCT</sub> and MRD<sub>post-HCT</sub>

Assessments on day +30, +60, +90, +180, +365 as defined in the land mark analysis.

|                     | MRD categories |            |           |           |           |
|---------------------|----------------|------------|-----------|-----------|-----------|
|                     | neg            | low        | high      | very high | total     |
| <b>Pre-HCT</b>      |                |            |           |           |           |
| MFC                 | 197 (75.8)     | 6 (2.3)    | 19 (7.3)  | 38 (14.6) | 260 (100) |
| qPCR                | 134 (37.6)     | 101 (28.4) | 63 (17.7) | 58 (16.3) | 356 (100) |
| <b>Day +30</b>      |                |            |           |           |           |
| MFC                 | 196 (94.2)     | 2 (1.0)    | 5 (2.4)   | 5 (2.4)   | 208 (100) |
| qPCR                | 147 (57.0)     | 78 (30.2)  | 26 (10.1) | 7 (2.7)   | 258 (100) |
| <b>Day +60</b>      |                |            |           |           |           |
| MFC                 | 55 (93.2)      | 2 (3.4)    | 1 (1.7)   | 1 (1.7)   | 59 (100)  |
| qPCR                | 93 (82.3)      | 14 (12.4)  | 6 (5.3)   | 0 (0)     | 113 (100) |
| <b>Day +90</b>      |                |            |           |           |           |
| MFC                 | 170 (96.6)     | 2 (1.1)    | 3 (1.7)   | 1 (1.0)   | 176 (100) |
| qPCR                | 162(63.5)      | 73 (28.6)  | 15 (5.9)  | 5 (2.0)   | 255 (100) |
| <b>Day +180</b>     |                |            |           |           |           |
| MFC                 | 46 (100)       | 0 (0)      | 0 (0)     | 0 (0)     | 46 (100)  |
| qPCR                | 131 (80.8)     | 19 (11.7)  | 5 (3.1)   | 8 (4.9)   | 162 (100) |
| <b>Day +365</b>     |                |            |           |           |           |
| MFC                 | 82 (97.6)      | 1 (1.2)    | 1 (1.2)   | 0 (0)     | 84 (100)  |
| qPCR                | 114 (84.4)     | 16 (11.8)  | 2 (1.5)   | 3 (2.2)   | 135 (100) |
| <b>Day &gt;+365</b> |                |            |           |           |           |
| MFC                 | 17 (94.4)      | 1 (5.6)    | 0 (0)     | 0 (0)     | 18 (100)  |
| qPCR                | 106 (89.1)     | 5 (4.2)    | 5 (4.2)   | 3 (2.5)   | 119 (100) |

Abbreviations: MRD minimal residual disease; neg negative, HCT hematopoietic stem cell transplantation; MFC multiparameter Flow Cytometry; qPCR Real-time PCR.

**Supplemental Table 7.**

Effect of aGVHD on outcome of patients who were MRD+ and MRD- at day+30, day +90 and day +180 post-HCT. Missing values of aGVHD were not included.

|                                | N   | (%) | 2y-EFS (%)<br>(95% CI) | P    | HR<br>(95% CI)     | P    | 2y-CIR (%)<br>(95% CI) | P     | HR<br>(95% CI)     | P     |
|--------------------------------|-----|-----|------------------------|------|--------------------|------|------------------------|-------|--------------------|-------|
| <b>MRD positive</b>            |     |     |                        |      |                    |      |                        |       |                    |       |
| <b>Day +30</b>                 |     |     |                        |      |                    |      |                        |       |                    |       |
|                                |     |     |                        | .001 |                    | .012 |                        | .008  |                    | <.001 |
| <i>MRD positive - no aGVHD</i> | 33  | 27  | 51 (36 - 71)           |      | 1                  |      | 49 (32 - 67)           |       | 1                  |       |
| <i>MRD positive - aGVHD</i>    | 90  | 73  | 68 (59 - 79)           |      | 0.35 (0.16 - 0.80) |      | 24 (15 - 33)           |       | 0.29 (0.16 - 0.55) |       |
| <b>Day +90</b>                 |     |     |                        |      |                    |      |                        |       |                    |       |
|                                |     |     |                        | .040 |                    | .045 |                        | <.001 |                    | <.001 |
| <i>MRD positive - no aGVHD</i> | 23  | 23  | 55 (37 - 80)           |      | 1                  |      | 46 (25 - 66)           |       | 1                  |       |
| <i>MRD positive - aGVHD</i>    | 75  | 75  | 70 (61 - 82)           |      | 0.49 (0.25 - 0.98) |      | 17 (8 - 25)            |       | 0.26 (0.12 - 0.57) |       |
| <b>Day +180</b>                |     |     |                        |      |                    |      |                        |       |                    |       |
|                                |     |     |                        | .094 |                    | .145 |                        | .301  |                    | .190  |
| <i>MRD positive - no aGVHD</i> | 12  | 38  | 42 (21 - 81)           |      | 1                  |      | 50 (22 - 78)           |       | 1                  |       |
| <i>MRD positive - aGVHD</i>    | 20  | 62  | 64 (47 - 90)           |      | 0.51 (0.21 - 1.26) |      | 35 (14 - 56)           |       | 0.56 (0.23 - 1.35) |       |
| <b>MRD negative</b>            |     |     |                        |      |                    |      |                        |       |                    |       |
| <b>Day +30</b>                 |     |     |                        |      |                    |      |                        |       |                    |       |
|                                |     |     |                        | .017 |                    | .021 |                        | <.001 |                    | <.001 |
| <i>MRD negative - no aGVHD</i> | 116 | 34  | 53 (45 - 64)           |      | 1                  |      | 39 (30 - 48)           |       | 1                  |       |
| <i>MRD negative - aGVHD</i>    | 221 | 66  | 71 (65 - 77)           |      | 0.66 (0.47 - 0.94) |      | 18 (13 - 23)           |       | 0.45 (0.30 - 0.69) |       |
| <b>Day +90</b>                 |     |     |                        |      |                    |      |                        |       |                    |       |
|                                |     |     |                        | .016 |                    | .107 |                        | .002  |                    | <.001 |
| <i>MRD negative - no aGVHD</i> | 113 | 35  | 63 (54 - 73)           |      | 1                  |      | 35 (26 - 44)           |       | 1                  |       |
| <i>MRD negative - aGVHD</i>    | 214 | 65  | 77 (72 - 83)           |      | 0.62 (0.42 - 0.92) |      | 17 (12 - 22)           |       | .44 (0.29 - 0.69)  |       |
| <b>Day +180</b>                |     |     |                        |      |                    |      |                        |       |                    |       |
|                                |     |     |                        | .002 |                    | .003 |                        | .001  |                    | .003  |
| <i>MRD negative - no aGVHD</i> | 60  | 34  | 80 (70 - 91)           |      | 1                  |      | 20 (9 - 31)            |       | 1                  |       |
| <i>MRD negative - aGVHD</i>    | 115 | 66  | 89 (83 - 95)           |      | 0.34 (0.17 - 0.70) |      | 9 (4 - 15)             |       | 0.31 (0.15 - 0.67) |       |

Abbreviations: aGVHD acute graft versus host disease; MRD minimal residual disease; HCT hematopoietic cell transplantation; EFS Event-free survival; CIR cumulative incidence of relapse; CI confidence interval; HR hazard ratio.

**Supplemental Table 8.**

Testing for Interaction between MRD and aGVHD on relapse. Coefficients and hazard ratios are from time dependent Cox regression model.

|                             | Coef      | se (coef) | z       | P     | HR (95% CI)        |
|-----------------------------|-----------|-----------|---------|-------|--------------------|
| <b>MRD</b>                  |           |           |         |       |                    |
| negative                    | reference |           |         |       |                    |
| positive                    | 1.2441    | 3.4698    | 0.2256  | <.001 | 3.47 (2.23 - 5.40) |
| <b>AGVHD</b>                |           |           |         |       |                    |
| negative                    | reference |           |         |       |                    |
| Grade I-II                  | -1.1071   | 0.2374    | -4.663  | <.001 | 0.33 (0.21 - 0.53) |
| Grade III-IV                | -0.7495   | 0.4026    | -1.861  | .0628 | 0.47 (0.21 - 1.04) |
| <b>Interaction</b>          |           |           |         |       |                    |
| MRD pos: aGVHD grade I-II   | 0.2570    | 0.3378    | 0.761   | .4466 | 1.29 (0.67 - 2.51) |
| MRD pos: aGVHD grade III-IV | -1.0852   | 0.663     | -1.2629 | .1034 | 0.34 (0.09 - 1.25) |

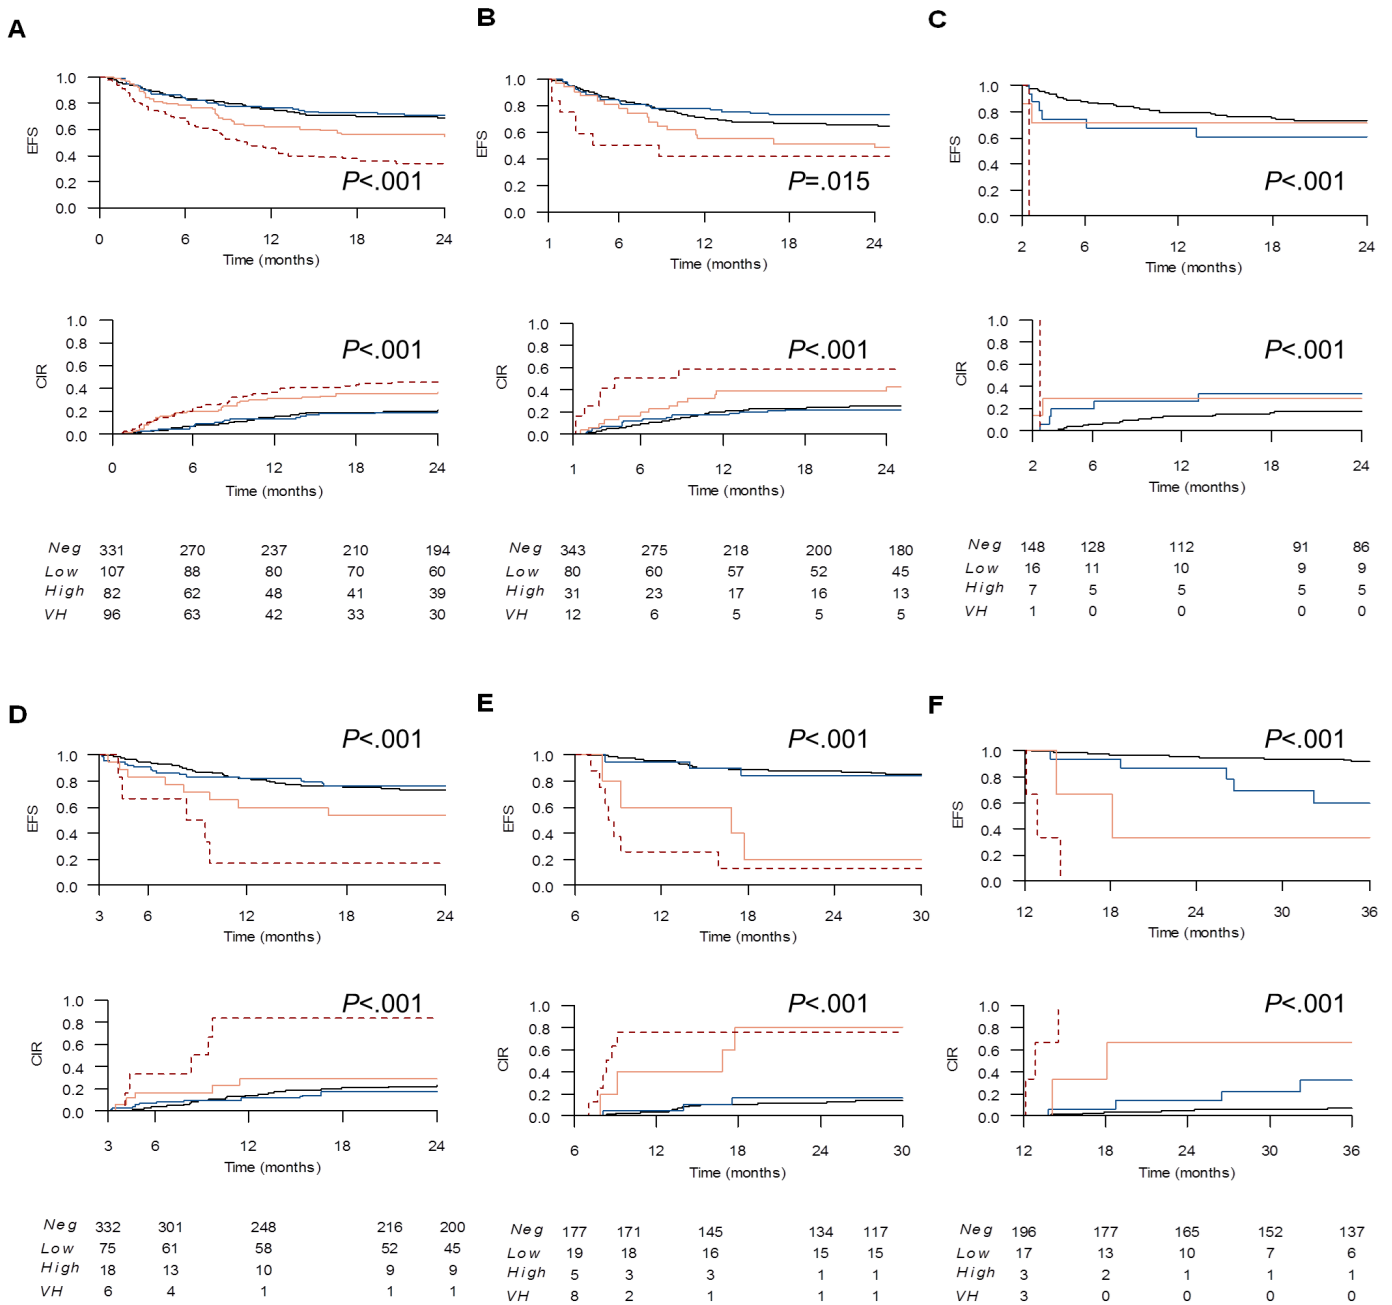

### Supplemental Figure 1.

Event-free survival (EFS) and cumulative incidence of relapse (CIR) in children with ALL who were MRD negative (solid blue), MRD low positive (solid gold), MRD high positive (solid grey) or MRD very high positive (dashed red) at different time points (A) prior to HCT (B) day +30; (C) day +60; (D) day +90; (E) day +180 and (F) day +365. P-values were determined using the log-rank test for EFS and the Gray test for CIR.

**A** Calibration of the model in the derivation cohort

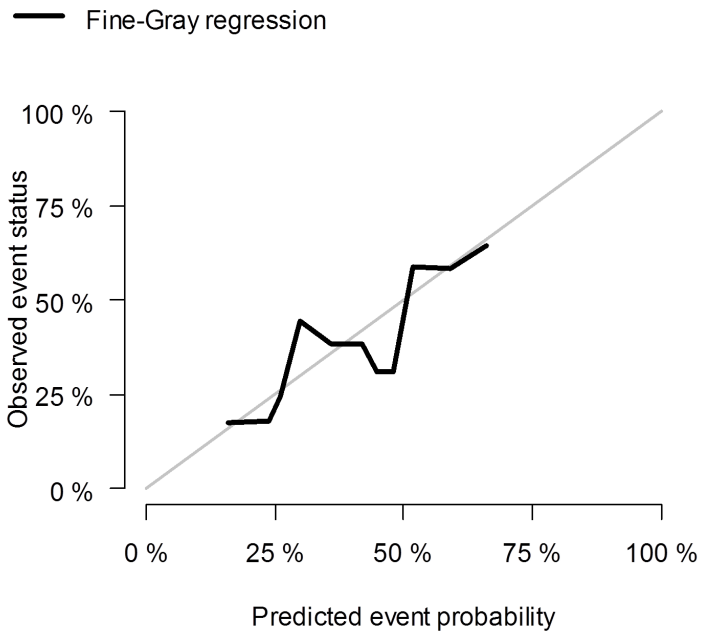

**B** Calibration of the model in the validation cohort

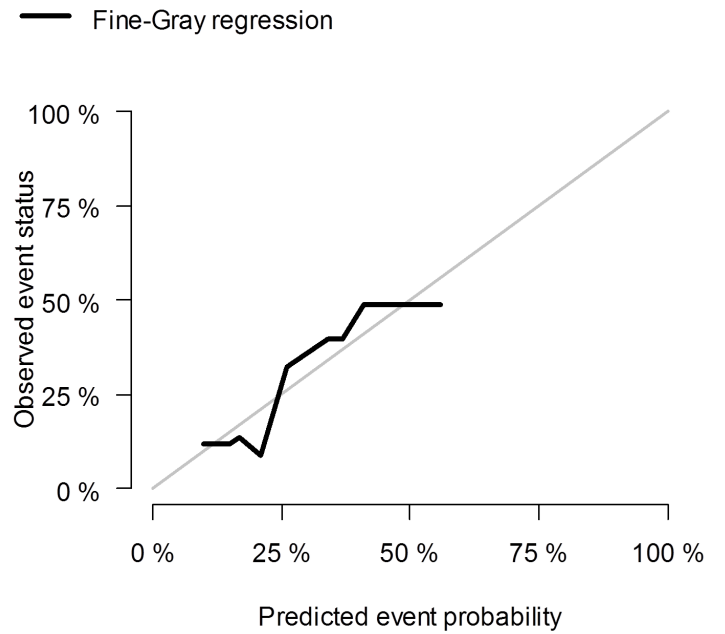

**Supplemental Figure 2.**

Calibration Plots for the integrated risk scores of the prognostic model based on pre-HCT MRD and baseline patient characteristics.
